# Supplementary material for: Monitoring photoswitching of azobenzene-based self-assembled monolayers on ultrathin platinum films by UV/Vis spectroscopy in the transmission modeElectronic supplementary information (ESI) available: synthesis and characterization of 1 and its photoisomerization in solution. See http://www.rsc.org/suppdata/jm/b3/b314710j/
Source: Royal Society of Chemistry journal article supplement (doi:10.1039/b314710j), 2004-01-01
Supplement: b314710j.pdf [file b314710j.pdf]

# Monitoring photoswitching of azobenzene-based self-assembled monolayers on ultrathin platinum films by UV-Vis spectroscopy in the transmission mode

Salvatore Sortino,<sup>a\*</sup> Salvatore Petralia,<sup>a</sup> Sabrina Conoci<sup>b</sup> and Santo Di Bella<sup>a\*</sup>

<sup>a</sup>*Dipartimento di Scienze Chimiche, Università di Catania, I-95125 Catania, Italy;*

*E-mail: [ssortino@mbox.unict.it](mailto:ssortino@mbox.unict.it); [sdibella@mbox.unict.it](mailto:sdibella@mbox.unict.it)*

<sup>b</sup>*SST Corporate R&D, ST Microelectronics, I-95121 Catania, Italy*

## Supplementary Information

**Chemicals and general procedures.** 4-(phenylazo)phenol (98%), 11-Br-1-undecene (95%), 1-dodecanethiol (98%), 9-borabicyclo[3.3.1]nonane (9-BBN) (99%) and sodium carbonate were purchased from Sigma-Aldrich (Milan) and used as received. All solvent used (from Carlo Erba, Milan) were analytical grade. Syntheses were carried out under a low intensity level of vis light.

**Instrumentation.** <sup>1</sup>H NMR spectra were recorded on a VARIAN INOVA 500 spectrometer, using TMS as internal standard. ESI-MS spectra were recorded on an Agilent 1100 Series ESI/MSD spectrometer. Experimental conditions were as follows: capillary voltage, 3.5 KV; fragmentor, 100 V; source temperature, 350 °C; drying gas, N<sub>2</sub> (10 L/min), carrier solvent, methanol (0.4 mL/min). The samples were dissolved in methanol containing trifluoroacetic acid. UV/vis absorption spectra were recorded with a Jasco V-560 spectrophotometer. AFM measurements were carried out in air by using a Dimention 3100S-1 (Digital Instruments). Aqueous contact angles were measured using a goniometer (KERNCO) under ambient conditions.

### Synthesis of phenyl-(4-undec-10-enyloxy)phenyl-diazene (A)

4-(phenylazo)phenol (0.40 g, 2.0 mmol), 11-Br-1-undecene (1.7 ml, 8.0 mmol) and sodium carbonate (3.0 g) were refluxed in 100 ml of acetonitrile for 3 days. The reaction mixture was filtered to eliminate the sodium carbonate suspension and then cooled at -18 °C for 3 hours. A yellow precipitate was obtained. The solid was filtered, washed and dried in vacuo (yield 45 %). Anal. calcd (%) for C<sub>23</sub>H<sub>31</sub>N<sub>2</sub>O: C, 78.81; H, 8.63; N, 7.99; found: C, 78.57; H, 8.50; N, 7.75. ESI-MS *m/z*: [M+H]<sup>+</sup> 351 (100%).

**Synthesis of 4-(11-dodecylsulfanyl-undecyloxy)-phenyl]-phenyl-diazene (1).** The synthesis of **1** was achieved by using a general method to obtain unsymmetrical sulfides.<sup>1S</sup> 1-dodecanthiol (0.18 g, 0.90 mmol) was added to 10 mL of THF solution of **A** (0.32 g, 0.90 mmol) containing a catalytic amount of 9-BBN (60 μL). The reaction mixture was stirred at 0 °C for 12 hours, under nitrogen atmosphere. Addition of methanol (5 mL) at room temperature led to the precipitation of a yellow solid. The precipitate was collected by filtration, washed several times with small amounts of THF,

and dried under vacuum (yield 90%). Anal. calcd (%) for  $C_{35}H_{56}N_2OS$ : C, 75.96; H, 10.21; N, 5.06; S, 5.80; found: C, 75.50; H, 10.05; N, 4.89; S, 5.92. ESI-MS  $m/z$ :  $[M+H]^+$  553 (100%).  $^1H$ -NMR ( $CDCl_3-d_1$ ):  $\delta$  7.9 (4H, d,  $J=8.0$  Hz,  $C_5H_4N=N-C_6H_4-O-$ ); 7.5 (3H, d,  $J=7.7$  Hz,  $C_5H_4N$ ); 7.0 (2H, d,  $J=8.0$  Hz,  $-C_5H_4-O-$ ); 4.0 (2H, t,  $J=7.3$  Hz,  $azo-O-\underline{CH_2}-(CH_2)_{10}-S-(CH_2)_{11}-CH_3$ ); 2.48 (4H, t,  $J=7.4$  Hz,  $azo-O-(CH_2)_{10}-\underline{CH_2}-S-\underline{CH_2}-(CH_2)_{10}-CH_3$ ); 1.76 (2H, t,  $J=7.5$  Hz,  $azo-O-CH_2-\underline{CH_2}-(CH_2)_9-S-(CH_2)_{11}-CH_3$ ); 1.52 (4H, q,  $J=7.4$  Hz,  $azo-O-(CH_2)_9-\underline{CH_2}-CH_2-S-CH_2-\underline{CH_2}-(CH_2)_9-CH_3$ ); 1.24 (34H, broad s,  $azo-O-CH_2-(CH_2)_8-CH_2-CH_2-S-CH_2-CH_2-(CH_2)_9-CH_3$ ); 0.86 (3H, t,  $J=7.5$  Hz,  $azo-O-(CH_2)_9-CH_2-CH_2-S-CH_2-CH_2-(CH_2)_9-\underline{CH_3}$ ).

**Photoisomerization of 1.** Figure 1S shows the absorption spectra of a 26  $\mu M$   $CH_2Cl_2$  solution of **1** recorded before (solid line) and after (dashed line) UV (350 nm) irradiation. The spectra were recorded under ambient conditions using a quartz cell with an optical pathway of 10 mm.

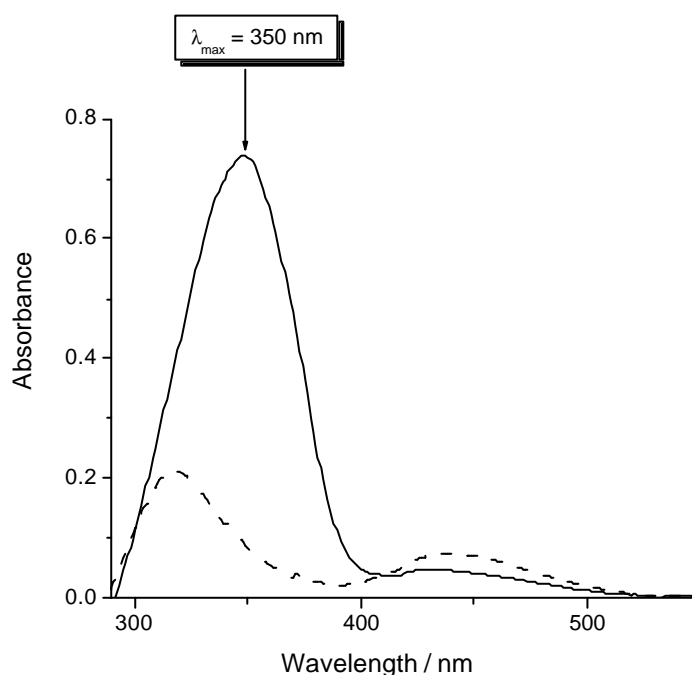

**Fig. 1S**

## References

- 1S. Y. Masuda, M. Hoshi, Y. Nunokawa, A. Arase, *J. Chem. Soc. Chem. Comm.*, 1991, 1444.
